# Supplementary material
Source: PubMed Central journal article supplement (PMC3494071)
Supplement: emmm0004-0705-SD2.pdf [file emmm0004-0705-SD2.pdf]

## SUPPLEMENTARY INFORMATION

## EMBO-MM

**Igf2 pathway dependency of the Trp53 developmental and tumour phenotypes**

Victoria L. Haley, David J. Barnes, Ionel Sandovici, Miguel Constanica, Christopher F. Graham, Francesco Pezzella, Claudia Bühnemann, Emma Carter, A. Bassim Hassan

**Table of Contents**

| Supplementary Information | Page |
|---------------------------|------|
| Table S1                  | 2    |
| Table S2                  | 3    |
| Table S3                  | 4    |
| Table S4                  | 5    |
| Table S5                  | 6    |
| Figure S1                 | 7    |
| Figure S2                 | 8    |
| Figure S3                 | 9    |
| Figure S4                 | 10   |
| Figure S5                 | 11   |
| Figure S6                 | 12   |
| Figure S7                 | 13   |
| Figure S8                 | 13   |
| Figure S9                 | 14   |
| Figure S10                | 15   |

**Supporting Tables**

| Parental genotype and strain                   | Cross | Time-point | WT    |        | Igf2 <sup>+m/-p</sup> |        | Total p value<br>$\chi^2$ |
|------------------------------------------------|-------|------------|-------|--------|-----------------------|--------|---------------------------|
|                                                |       |            | ♂     | ♀      | ♂                     | ♀      |                           |
|                                                |       |            | Upper | Middle | Lower                 | Middle |                           |
| F1=B6 WT ♀ x 129 Igf2 <sup>+m/-p</sup> ♂       |       | P0         | 64    | 46     | 39                    | 36     | 185                       |
|                                                |       |            | (46)  | (46)   | (46)                  | (46)   | p<0.05                    |
|                                                |       | P3.5       | 6.81  | 0.00   | 1.14                  | 2.27   | 10.22                     |
|                                                |       |            | 56    | 43     | 33                    | 23     | 155                       |
|                                                |       |            | (39)  | (39)   | (39)                  | (39)   | p<0.01                    |
|                                                |       |            | 7.68  | 0.47   | 0.85                  | 6.40   | 15.40                     |
| 129 WT ♀ x F1 Igf2 <sup>+m/-p</sup> ♂          | N2    | P0         | 45    | 48     | 54                    | 44     | 191                       |
|                                                |       |            | (48)  | (48)   | (48)                  | (48)   | p=NS                      |
|                                                |       | P3.5       | 0.16  | 0.00   | 0.82                  | 0.29   | 1.27                      |
|                                                |       |            | 45    | 46     | 49                    | 38     | 178                       |
|                                                |       |            | (45)  | (45)   | (45)                  | (45)   | p=NS                      |
|                                                |       |            | 0.00  | 0.05   | 0.46                  | 0.95   | 1.46                      |
| F2=B6 WT ♀ x F1 Igf2 <sup>+m/-p</sup> ♂        | N2    | P0         | 86    | 90     | 71                    | 53     | 300                       |
|                                                |       |            | (75)  | (75)   | (75)                  | (75)   | p<0.05                    |
|                                                |       | P3.5       | 1.61  | 3.00   | 0.21                  | 6.45   | 11.28                     |
|                                                |       |            | 79    | 85     | 35                    | 21     | 220                       |
|                                                |       |            | (55)  | (55)   | (55)                  | (55)   | p<0.001                   |
|                                                |       |            | 16.37 | 10.47  | 7.27                  | 21.02  | 55.13                     |
| F3=B6 WT ♀ x F2 Igf2 <sup>+m/-p</sup> ♂        | N3    | P0         | 54    | 56     | 48                    | 22     | 180                       |
|                                                |       |            | (45)  | (45)   | (45)                  | (45)   | p<0.001                   |
|                                                |       | P3.5       | 1.80  | 2.69   | 0.20                  | 11.76  | 16.44                     |
|                                                |       |            | 50    | 55     | 10                    | 7      | 122                       |
|                                                |       |            | (31)  | (31)   | (31)                  | (31)   | p<0.001                   |
|                                                |       |            | 12.47 | 19.68  | 13.78                 | 18.11  | 64.03                     |
| F4=B6 WT ♀ x F3 Igf2 <sup>+m/-p</sup> ♂        | N4    | P0         | 18    | 22     | 20                    | 11     | 71                        |
|                                                |       |            | (18)  | (18)   | (18)                  | (18)   | p=NS                      |
|                                                |       | P3.5       | 0.00  | 1.02   | 0.29                  | 2.57   | 3.87                      |
|                                                |       |            | 14    | 18     | 5                     | 3      | 40                        |
|                                                |       |            | (10)  | (10)   | (10)                  | (10)   | p<0.01                    |
|                                                |       |            | 1.6   | 6.4    | 2.5                   | 4.9    | 15.4                      |
| F5=B6 WT ♀ x F4 Igf2 <sup>+m/-p</sup> ♂        | N5    | P0         | 11    | 12     | 10                    | 8      | 41                        |
|                                                |       |            | (10)  | (10)   | (10)                  | (10)   | p=NS                      |
|                                                |       | P3.5       | 0.05  | 0.30   | 0.00                  | 0.49   | 0.85                      |
|                                                |       |            | 11    | 12     | 1                     | 0      | 24                        |
|                                                |       |            | (6)   | (6)    | (6)                   | (6)    | p<0.001                   |
|                                                |       |            | 4.17  | 6.00   | 4.17                  | 6.00   | 20.33                     |
| F6=B6 WT ♀ x F5 Igf2 <sup>+m/+p</sup> ♂<br>(†) | N6    | P0         | 12    | 11     | 9                     | 8      | 40                        |
|                                                |       |            | (10)  | (10)   | (10)                  | (10)   | p=NS                      |
|                                                |       | P3.5       | 0.40  | 0.10   | 0.10                  | 0.40   | 1.00                      |
|                                                |       |            | 11    | 11     | 1                     | 1      | 24                        |
|                                                |       |            | (6)   | (6)    | (6)                   | (6)    | p<0.001                   |
|                                                |       |            | 4.17  | 4.17   | 4.17                  | 4.17   | 16.67                     |

† - F5 Igf2<sup>m/+p</sup> ♂ is <sup>-m/+p</sup> not <sup>+m/-p</sup> as in all previous stages of breeding

**Table S1.****Failure to backcross Igf2<sup>+m/-p</sup> (Igf2<sup>Tm1Rob-pat/+</sup>) targeted disruption on C57BL/6J background.**

B6 WT females were crossed with 129 Igf2<sup>+m/-p</sup> males and the Mendelian segregation determined at P0 and P3.5. At generations N2 and N3, there was a significant deviation from the expected Mendelian segregation at P0. At P3.5, there was a significant deviation in the expected number of progeny at all generations, with no female and one male Igf2<sup>+m/-p</sup> surviving to P3.5 at the 5<sup>th</sup> generation. B6 WT females mated with F5 Igf2<sup>+m/+p</sup> males resulted in a normal Mendelian ratio at P0, but almost complete deficit of F6 Igf2<sup>+m/-p</sup> progeny by P3.5. In contrast, 129 WT females crossed with F1 Igf2<sup>+m/-p</sup> males were born at the expected Mendelian distribution at P0 and P3.5. Upper value – observed number. Middle value – expected number. Lower number –  $\chi^2$  value. Far right hand column, middle value – p value. All 3 df.

| Parental genotype                                                                           | Strain  | WT                     | <i>Igf2</i> <sup>+/-</sup> | <i>p53</i> <sup>+/-</sup> | <i>Igf2</i> <sup>+/-</sup><br><i>p53</i> <sup>+/-</sup> | <i>p53</i> <sup>-/-</sup> | <i>Igf2</i> <sup>-/-</sup><br><i>p53</i> <sup>+/-</sup> | Total<br>p value<br>$\chi^2$ value |
|---------------------------------------------------------------------------------------------|---------|------------------------|----------------------------|---------------------------|---------------------------------------------------------|---------------------------|---------------------------------------------------------|------------------------------------|
| <i>Igf2</i> <sup>+m/-p</sup> ♀ x<br><i>p53</i> <sup>+/-</sup> ♂                             | 129     | 46<br>(40.25)<br>0.821 | 37<br>(40.25)<br>0.262     | 38<br>(40.25)<br>0.126    | 40<br>(40.25)<br>0.001                                  | -                         | -                                                       | 161<br>p=NS<br>1.211               |
| <i>p53</i> <sup>+/-</sup> ♀ x<br><i>Igf2</i> <sup>+m/-p</sup> ♂                             | 129     | 10<br>(11.25)<br>0.139 | 12<br>(11.25)<br>0.05      | 12<br>(11.25)<br>0.05     | 11<br>(11.25)<br>0.006                                  | -                         | -                                                       | 45<br>p=NS<br>0.244                |
| <i>Igf2</i> <sup>+m/-p</sup> x <i>p53</i> <sup>+/-</sup><br>(†)                             | 129B6F1 | 14<br>(17.25)<br>0.612 | 15<br>(17.25)<br>0.293     | 19<br>(17.25)<br>0.178    | 21<br>(17.25)<br>0.815                                  | -                         | -                                                       | 69<br>p=NS<br>1.900                |
| <i>Igf2</i> <sup>+m/-p</sup> , <i>p53</i> <sup>+/-</sup><br>♀ x <i>p53</i> <sup>+/-</sup> ♂ | 129B6F2 | 9<br>(5.50)<br>2.227   | 4<br>(5.50)<br>0.409       | 12<br>(11.00)<br>0.091    | 7<br>(11.00)<br>1.454                                   | 10<br>(5.50)<br>3.682     | 2<br>(5.50)<br>2.227                                    | 44<br>p=NS<br>10.091               |

† - 129B6F1 *Igf2*<sup>+m/-p</sup> x *p53*<sup>+/-</sup> could be either *Igf2*<sup>+m/-p</sup> ♀ x *p53*<sup>+/-</sup> ♂ or *p53*<sup>+/-</sup> ♀ x *Igf2*<sup>+m/-p</sup> ♂

### Table S2.

#### Normal Mendelian segregation of progeny from breeding *Igf2* and *p53* heterozygous males and females by post-natal day 10.

On a 129J strain, the progeny from *Igf2*<sup>+m/-p</sup> females x *p53*<sup>+/-</sup> males and *p53*<sup>+/-</sup> females x *Igf2*<sup>+m/-p</sup> males conformed to the expected Mendelian ratios. The progeny from a 129B6F1 cross also conformed to the expected Mendelian frequencies (3df). Whilst *Igf2*<sup>+m/-p</sup>, *p53*<sup>+/-</sup> female x *p53*<sup>+/-</sup> male progeny conformed to the expected Mendelian segregation, although there was a trend towards significance (n=44, p=NS,  $\chi^2 = 10.091$ ) and it may be that the low numbers were confounding the analysis. Upper value – observed, middle value – expected, lower value -  $\chi^2$  value. Except right-hand column where middle value – p value.

| Parental genotype                                                 | Strain  | WT      | $H19^{m/+p}$ (*) | $H19^{m/-p}$ | $p53^{-/-}$ | $H19^{m/+p}$<br>$p53^{+/-}$ (*) | $H19^{m/-p}$<br>$p53^{+/-}$ | $p53^{-/-}$ | $H19^{m/+p}$<br>$p53^{+/-}$ (*) | $H19^{m/-p}$<br>$p53^{+/-}$ | Total<br>p value<br>$\chi^2$ value |       |
|-------------------------------------------------------------------|---------|---------|------------------|--------------|-------------|---------------------------------|-----------------------------|-------------|---------------------------------|-----------------------------|------------------------------------|-------|
| $H19^{m/+p}$ x $p53^{+/-}$<br>(†)                                 | 129     | 16      | 15               | -            | 19          | 12                              | -                           | -           | -                               | -                           | 62                                 |       |
|                                                                   |         | (15.50) | (15.50)          | (15.50)      | (15.50)     | (15.50)                         | (15.50)                     | (15.50)     | (15.50)                         | (15.50)                     | (15.50)                            | p=NS  |
|                                                                   | B6      | 17      | 13               | -            | 17          | 26                              | -                           | -           | -                               | -                           | -                                  | 73    |
|                                                                   |         | (18.25) | (18.25)          | (18.25)      | (18.25)     | (18.25)                         | (18.25)                     | (18.25)     | (18.25)                         | (18.25)                     | (18.25)                            | p=NS  |
|                                                                   | B6129F1 | 3       | 4                | -            | 5           | 7                               | -                           | -           | -                               | -                           | -                                  | 19    |
|                                                                   |         | (4.75)  | (4.75)           | (4.75)       | (4.75)      | (4.75)                          | (4.75)                      | (4.75)      | (4.75)                          | (4.75)                      | (4.75)                             | p=NS  |
| $H19^{m/+p}$ , $p53^{+/-}$<br>♀ x<br>$p53^{+/-}$ ♂                | 129     | 2       | 4                | -            | 12          | 8                               | -                           | 5           | 3                               | -                           | 34                                 |       |
|                                                                   |         | (4.25)  | (4.25)           | (4.25)       | (8.50)      | (8.50)                          | (8.50)                      | (4.25)      | (4.25)                          | (4.25)                      | (4.25)                             | p=NS  |
|                                                                   | B6      | 6       | 6                | -            | 9           | 15                              | -                           | 4           | 4                               | -                           | -                                  | 44    |
|                                                                   |         | (5.50)  | (5.50)           | (5.50)       | (11.00)     | (11.00)                         | (11.00)                     | (5.50)      | (5.50)                          | (5.50)                      | (5.50)                             | p=NS  |
|                                                                   | B6129F1 | 0.045   | 0.045            | -            | 0.364       | 1.454                           | -                           | 0.409       | 0.409                           | -                           | -                                  | 2.727 |
|                                                                   |         | (2.94)  | (5.88)           | (2.94)       | (5.88)      | (11.75)                         | (5.88)                      | (2.94)      | (5.88)                          | (2.94)                      | (2.94)                             | p=NS  |
| $H19^{m/+p}$ , $p53^{+/-}$<br>♀ x<br>$H19^{m/+p}$ , $p53^{+/-}$ ♂ | 129     | 2       | 7                | 6            | 5           | 14                              | 4                           | 5           | 4                               | 0                           | 47                                 |       |
|                                                                   |         | (2.94)  | (5.88)           | (2.94)       | (5.88)      | (11.75)                         | (5.88)                      | (2.94)      | (5.88)                          | (2.94)                      | (2.94)                             | p=NS  |
|                                                                   | B6      | 0.299   | 0.215            | 3.192        | 0.130       | 0.431                           | 0.598                       | 1.448       | 0.598                           | 2.94                        | 2.94                               | 9.851 |
|                                                                   |         | (6.56)  | (13.16)          | (6.56)       | (13.16)     | (26.25)                         | (13.16)                     | (6.56)      | (13.16)                         | (6.56)                      | (6.56)                             | p=NS  |
|                                                                   | B6129F2 | 0.048   | 1.144            | 0.372        | 0.268       | 2.288                           | 0.744                       | 0.372       | 2.858                           | 0.048                       | 0.048                              | 8.143 |
|                                                                   |         | (2.94)  | (5.88)           | (2.94)       | (5.88)      | (11.75)                         | (5.88)                      | (2.94)      | (5.88)                          | (2.94)                      | (2.94)                             | p=NS  |
|                                                                   |         | 0.299   | 1.407            | 1.448        | 0.003       | 0.005                           | 0.598                       | 1.448       | 0.215                           | 0.001                       | 5.426                              |       |

†  $H19^{+/-}$  x  $p53^{+/-}$  could be either  $H19^{m/+p}$  ♀ x  $p53^{+/-}$  ♂ or  $p53^{+/-}$  ♀ x  $H19^{m/+p}$  ♂

- $H19^{m/+p/-}$  progeny from the  $H19^{m/+p}$ ,  $p53^{+/-}$  ♀ x  $p53^{+/-}$  ♂ are  $H19^{m/+p}$ . Progeny from  $H19^{m/+p}$  x  $p53^{+/-}$  and  $H19^{m/+p}$ ,  $p53^{+/-}$  ♀ x  $H19^{+/-}$ ,  $p53^{+/-}$  ♂ are a combination of  $H19^{m/+p}$  and  $H19^{+m/-p}$ .

**Table S3.**

**Bi-allelic *Igf2* expression following maternal allele deletion  $H19^{m/+p}$  ( $\Delta 13$ kb) did not alter the embryonic survival of progeny either alone or combined with  $p53^{+/-}$  mice.**

On 129, B6 and B6129F1 strains, the progeny from  $H19^{m/+p}$  x  $p53^{+/-}$  breeding conformed to the expected Mendelian ratios. The progeny from  $H19^{m/+p}$ ,  $p53^{+/-}$  females x  $p53^{+/-}$  males conformed to the expected Mendelian frequencies on pure 129 and B6 mouse strains. There was no significant difference in the Mendelian distribution of progeny from  $H19^{m/+p}$ ,  $p53^{+/-}$  females x  $H19^{m/+p}$ ,  $p53^{+/-}$  males, irrespective of mouse strain. Upper– observed, middle– expected, lower–  $\chi^2$  value.

| Tumor Type | Genotype                     | Intact non targeted allele | Mutant Non-targeted allele | Type of mutation | Equivalent human amino acid                                    |
|------------|------------------------------|----------------------------|----------------------------|------------------|----------------------------------------------------------------|
| Lymphoma   | <i>Igf2</i> <sup>+m/-p</sup> | 1                          | 0                          |                  |                                                                |
|            | <i>Igf2</i> <sup>+m/+p</sup> | 5                          | 2                          | Point mutations  | R196R, V203L, E204E, N239S, S241S<br>T211I, E221K, C222R, 228N |
|            | <i>H19</i> <sup>+m/+p</sup>  |                            |                            |                  |                                                                |
| Carcinoma  | <i>H19</i> <sup>-m/+p</sup>  | 2                          | 0                          |                  |                                                                |
|            | <i>Igf2</i> <sup>+m/-p</sup> | 1                          | 1                          | Point mutations  | Y163F, H168H, M169I, T170L, R181W                              |
|            | <i>Igf2</i> <sup>+m/+p</sup> | 1                          | 1                          | Point mutations  | Y163F, H168H, M169I, T170L, R181W                              |
| Sarcoma    | <i>H19</i> <sup>-m/+p</sup>  | 4                          | 0                          |                  |                                                                |
|            | <i>Igf2</i> <sup>+m/-p</sup> | 1                          | 0                          |                  |                                                                |
|            | <i>Igf2</i> <sup>+m/+p</sup> | 0                          | 0                          |                  |                                                                |
|            | <i>H19</i> <sup>+m/+p</sup>  | 1                          | 1                          | Splicing error   | Exon 5-6 boundary                                              |

**Table S4.**

**Mutations of the intact allele in *p53*<sup>+/-</sup> tumors by *Igf2* and *H19* genotype and tumor type.** Two of five lymphomas and one of two carcinomas WT for *Igf2* had mutation of the intact (non-targeted) *p53* allele. One of two carcinomas that were null for *Igf2* (*Igf2*<sup>+m/-p</sup>) and one of two sarcomas with bi-allelic *Igf2* expression had a mutation in the intact *p53* allele.

| Strain   | Genotype                                                                                            | Abbreviation (heterozygote)                                                                                                                       | Generation      | Developmental phenotype                                            | Reference                           |
|----------|-----------------------------------------------------------------------------------------------------|---------------------------------------------------------------------------------------------------------------------------------------------------|-----------------|--------------------------------------------------------------------|-------------------------------------|
| 129S2/J  | <i>Igf2</i> <sup>Tm1Rob-pat/+</sup>                                                                 | <i>Igf2</i> <sup>+/-</sup>                                                                                                                        | >20             | Paternal K.O. – 60% size of WT<br>Maternal K.O. – same size as WT  | Dechiara, 1990                      |
| C57BL/6J | <i>Igf2</i> <sup>Tm1Rob-pat/+</sup>                                                                 | <i>Igf2</i> <sup>+/-</sup>                                                                                                                        | 4 <sup>th</sup> | Lethal beyond 4 <sup>th</sup> backcross to generation              | Unpublished                         |
| 129S2/J  | <i>Trp53</i> <sup>Tm1Brd/+</sup>                                                                    | <i>p53</i> <sup>+/-</sup><br><i>p53</i> <sup>-/-</sup>                                                                                            | >20             | Unchanged<br>Female specific exencephaly                           | Clarke, 1993                        |
| C57BL/6J | <i>Trp53</i> <sup>Tm1Brd/+</sup>                                                                    | <i>p53</i> <sup>+/-</sup>                                                                                                                         | 10-20           | Unchanged                                                          | Unpublished                         |
| C57BL/6J | <i>H19</i> <sup>Tm1Tilg/+</sup>                                                                     | <i>H19</i> <sup>+/-</sup><br>( <i>H19</i> <sup>+/<math>\Delta</math>13kb</sup> )                                                                  | >20             | Paternal K.O. – same size as WT<br>Maternal K.O. – 128% size of WT | Leighton, 1995                      |
| 129S2/J  | <i>H19</i> <sup>Tm1Tilg/+</sup>                                                                     | <i>H19</i> <sup>+/-</sup>                                                                                                                         | 5-9             | Ongoing analysis                                                   | Unpublished                         |
| C57BL/6J | <i>Igf2</i> <sup>loxP</sup>                                                                         | <i>Igf2</i> <sup>+/<math>\Delta</math>loxP</sup> – intact<br><i>Igf2</i> <sup>+/<math>\Delta</math></sup> – deleted<br>(deleted region exons 4-6) | >10             | Intact allele – unchanged<br>Deleted allele – not quantified       | Miguel<br>Constancia<br>Unpublished |
| B6.FVBN  | <i>Trp53</i> <sup>Tm1Brd</sup>                                                                      | <i>p53</i> <sup>+/<math>\Delta</math>loxP</sup> – intact<br><i>p53</i> <sup>+/<math>\Delta</math></sup> – deleted<br>(deleted region exons 2-10)  | >5              | Intact allele – unchanged<br>Deleted allele – unchanged            | Jonkers, 2001                       |
| C57BL/6J | <i>Gt(ROSA)26</i><br><i>CreER</i> <sup>T</sup><br><i>Sor</i> <sup>Tm1(cre/Esr1)</sup><br><i>Nat</i> | R26Cre <sup>+/-</sup>                                                                                                                             | >10             | Unchanged                                                          | Badea, 2003                         |

**Table S5.****Mouse genetic models; strain, genotype and developmental phenotype.**

+ denotes WT allele, - denotes allele with targeted mutation (germ-line knock-out), *H19*<sup>-m/+p</sup> had disruption of *Igf2/H19* imprinting control region and *H19* gene. fl denotes loxP flanked alleles,  $\Delta$  denotes conditional alleles that have undergone recombination.

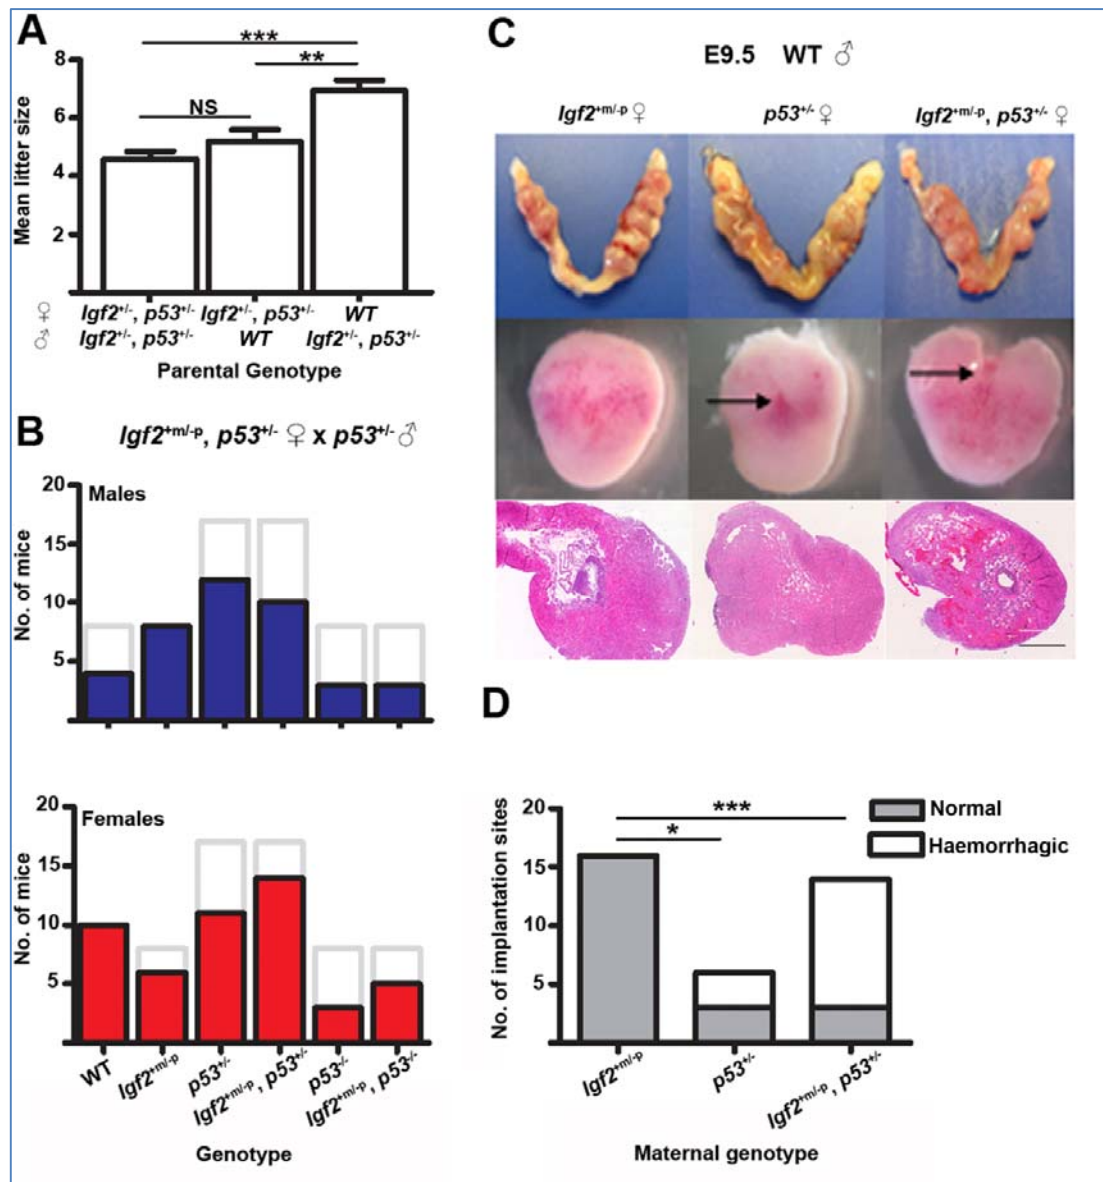

**Figure S1. Reduced litter size derived from  $Igf2^{+m/p}, p53^{+/-}$  females was associated with decidual haemorrhage.**

**A.** Reduced litter size were derived from  $Igf2^{+m/p}, p53^{+/-}$  females (note  $Igf2^{+m/p}$  denoted  $Igf2^{+/-}$  for clarity). Significantly fewer progeny were obtained from mating of  $Igf2^{+m/p}, p53^{+/-}$  females with  $Igf2^{+m/p}, p53^{+/-}$  males ( $***p < 0.0001$ , 1-way ANOVA, mean of 64 litters) and  $Igf2^{+m/p}, p53^{+/-}$  females with WT males ( $**p < 0.01$ , mean of 25 litters) than from  $Igf2^{+m/p}, p53^{+/-}$  males with WT females (mean of 45 litters). **B.** Male (top, solid blue bars, total = 40) and female (bottom, solid red bars, total = 49) progeny from  $Igf2^{+m/p}, p53^{+/-}$  females mated with  $p53^{+/-}$  males segregated according to the expected Mendelian distribution (gray, unfilled bars). The reduction of male offspring was independent of genotype and appeared significant ( $P < 0.05$ ,  $\chi^2$ -test) compared to the expected numbers derived from all previous breeding from 129 mice. **C.** Uterine horns (upper panels) were removed from pregnant females at E9.5 and representative implantation sites shown (middle panels). In  $Igf2^{+m/p}, p53^{+/-}$  mothers, the maternal deciduas appeared abnormal, that was also evident in a small proportion of  $p53^{+/-}$  mothers (arrows). Implantation sites from  $Igf2^{+m/p}$  mothers appeared normal. (Lower panel) Haematoxylin and eosin sections showed blood-filled implantation sites in  $Igf2^{+m/p}, p53^{+/-}$  mothers (right). Scale bar – 1mm. **D.**  $Igf2^{+m/p}, p53^{+/-}$  females had significantly more haemorrhagic implantation sites (11/14) compared to  $p53^{+/-}$  females (3/6) and  $Igf2^{+m/p}$  females (0/16). ( $*P < 0.05$ ,  $***P < 0.0001$ , Fisher's exact test).

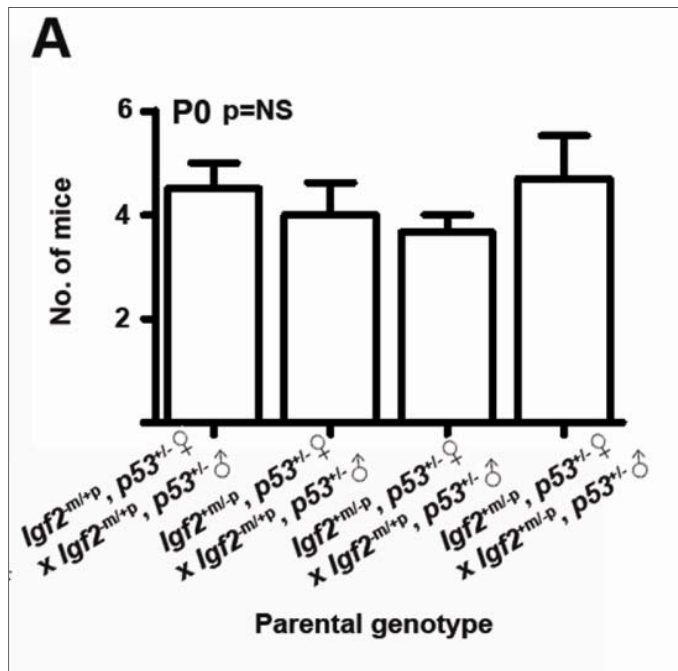

**Figure S2.**

The reduction in mean litter size from the 129 *Igf2*<sup>+m/-p</sup>, *p53*<sup>+/-</sup> inter-cross was irrespective of the parental *Igf2* allelic dose.

There was no significant difference ( $p=0.826$ , one-way ANOVA) in the mean litter sizes between *Igf2*<sup>m/+p</sup>, *p53*<sup>+/-</sup> females mated with *Igf2*<sup>m/+p</sup>, *p53*<sup>+/-</sup> males ( $n=4$  litters, mean litter size =  $4.500 \pm 0.500$ ), *Igf2*<sup>+m/-p</sup>, *p53*<sup>+/-</sup> females mated with *Igf2*<sup>+m/-p</sup>, *p53*<sup>+/-</sup> males ( $n=7$  litters, mean litter size =  $4.000 \pm 0.617$ ), *Igf2*<sup>+m/-p</sup>, *p53*<sup>+/-</sup> females mated with *Igf2*<sup>+m/-p</sup>, *p53*<sup>+/-</sup> males ( $n=3$  litters, mean litter size =  $3.667 \pm 0.333$ ) and *Igf2*<sup>m/+p</sup>, *p53*<sup>+/-</sup> females mated with *Igf2*<sup>+m/-p</sup>, *p53*<sup>+/-</sup> males ( $n=10$  litters, mean litter size =  $4.700 \pm 0.817$ ).



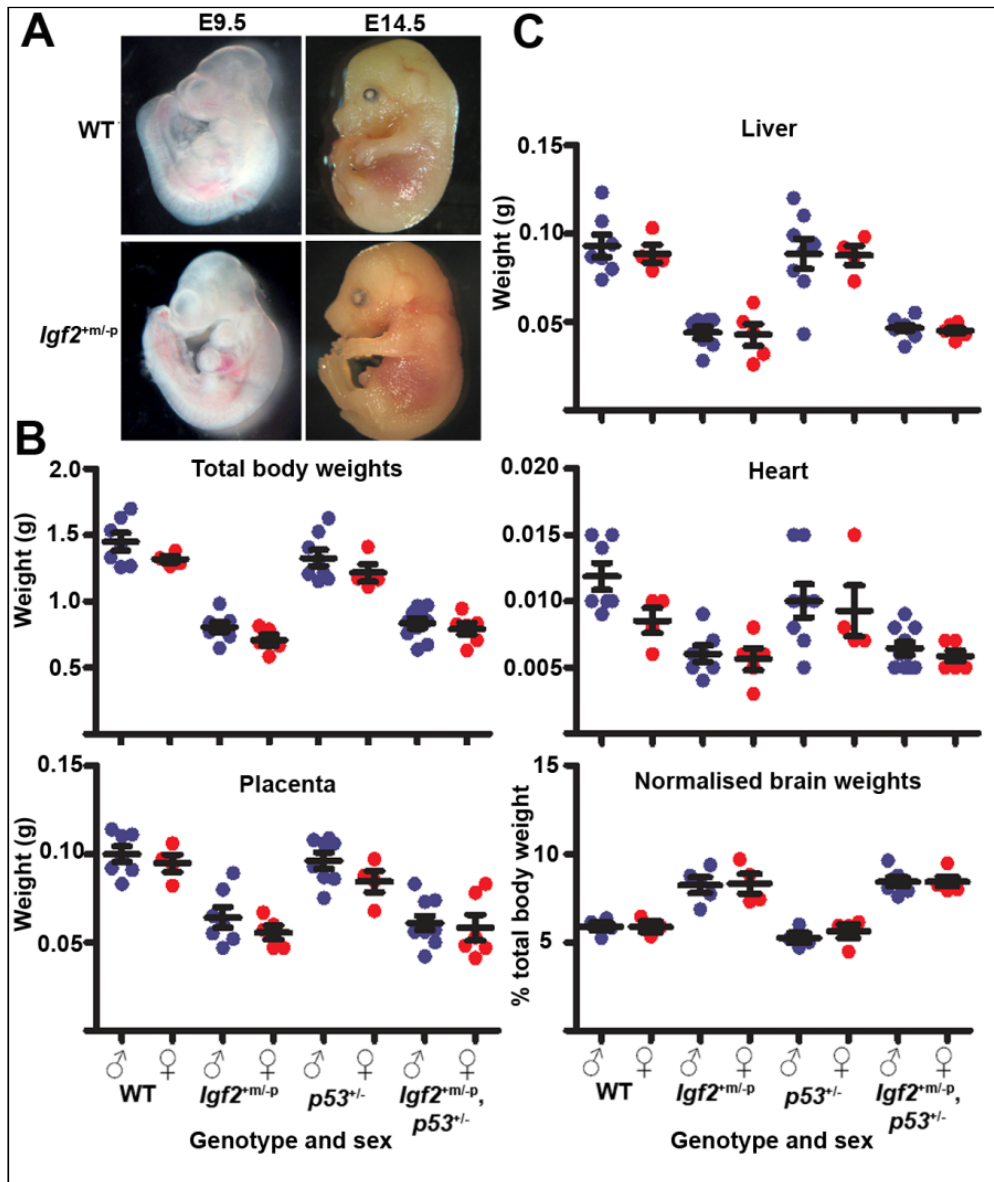

**Figure S3.**

**Normal gross morphology but reduced growth in 129 *Igf2<sup>+ml-p</sup>* female embryos.**

**A.** 129 *Igf2<sup>+ml-p</sup>* females did not exhibit gross morphological abnormalities during development. Upper panel – WT embryo at E9.5 (n=7 examined) and E14.5-15.5 (n=1 examined). Lower panel – *Igf2<sup>+ml-p</sup>* females at E9.5 (n=4 examined) and E14.5-15.5 (n=1 examined). **B. & C.** Reduced embryonic growth of mice that lack the paternal allele of *Igf2* was independent of p53 and embryo sex (blue-males, red-females). Significant weight differences were matched in the embryo, placenta, liver, heart and brains (including brains weight normalised to body weight) of mice with intact *Igf2* paternal allele (WT and *p53<sup>+/-</sup>*) compared to mice functionally null for *Igf2* (*Igf2<sup>+ml-p</sup>* and *Igf2<sup>+ml-p</sup>, p53<sup>+/-</sup>*,  $p < 0.0001$ , 1-way ANOVA, Tukey's multiple comparison).

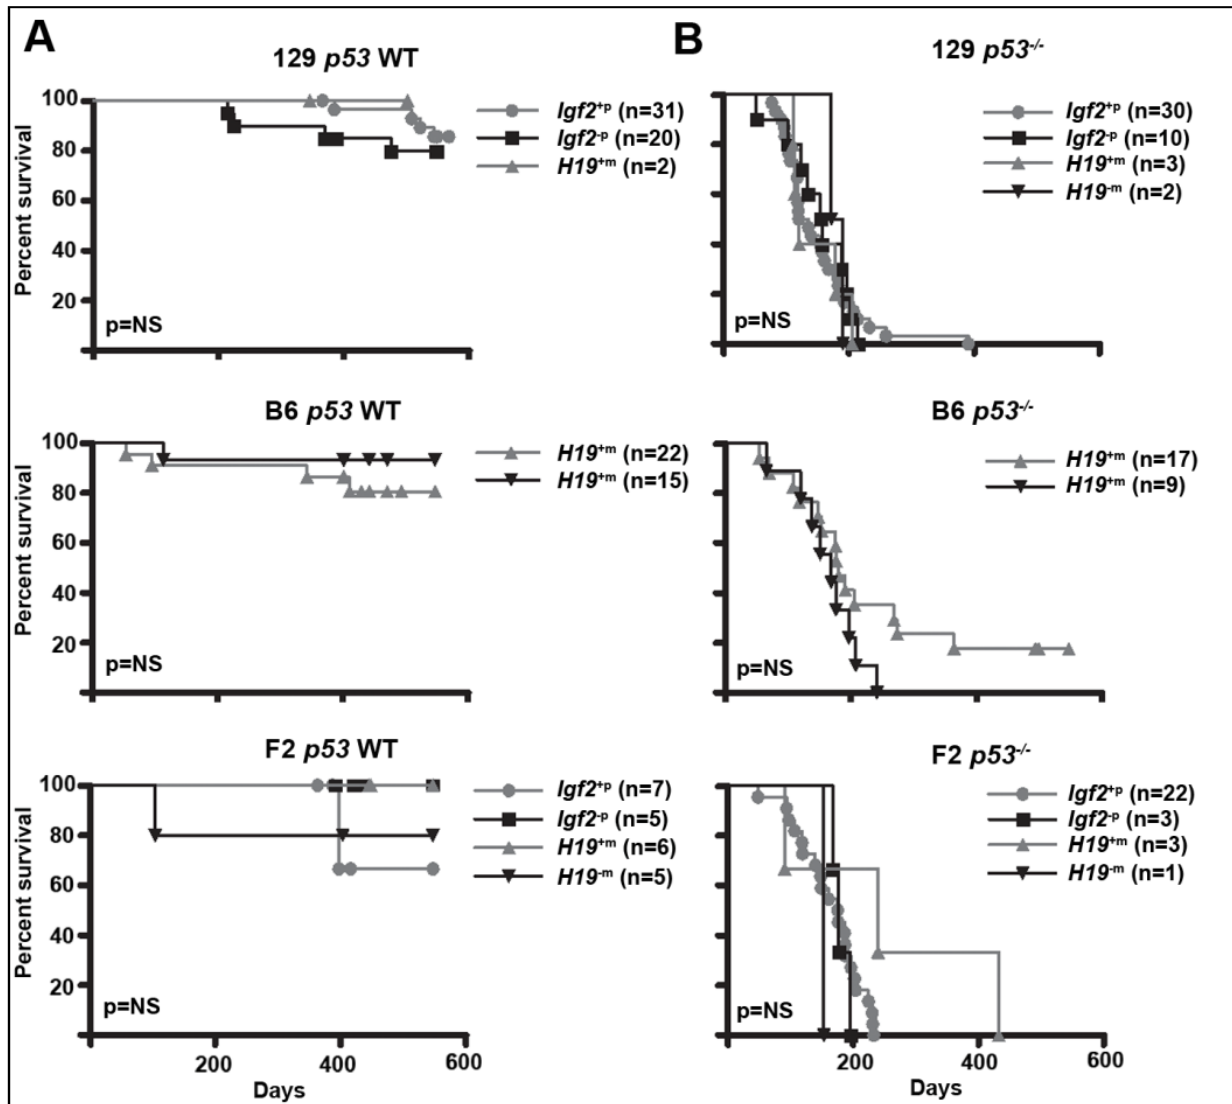

**Figure S4.**

Survival of *p53* WT or *p53* homozygous null mice to 18 months was independent of *Igf2* allelic dose and mouse strain.

**A, Top** – There was no significant difference in survival of 129 *p53* WT mice ( $p=NS$ , Log Rank test) with loss of *Igf2* ( $Igf2^{-/-}$ ,  $n=31$ ) compared to mice mono-allelic for *Igf2* ( $Igf2^{+/-}$ ,  $n=20$  or  $H19^{+/+}$ ,  $n=2$ ). **Middle** – Gain of *Igf2* function through disruption of *H19* ( $H19^{-/-}$ ,  $n=15$ ) did not alter survival of B6 *p53* WT mice ( $p=NS$ , Log Rank test) compared to mice mono-allelic for *Igf2* ( $H19^{+/+}$ ,  $n=22$ ). **Bottom** – Loss of *Igf2* ( $Igf2^{-/-}$ ,  $n=5$ ) or gain of *Igf2* ( $H19^{-/-}$ ,  $n=5$ ) did not significantly alter survival of F2 hybrid *p53* WT mice compared to mice mono-allelic for *Igf2* ( $Igf2^{+/-}$ ,  $n=7$  or  $H19^{+/+}$ ,  $n=6$ ,  $p=NS$ , Log Rank test). **B, Top** – There was no significant difference in survival of 129 *p53*<sup>-/-</sup> mice with loss of *Igf2* ( $Igf2^{-/-}$ ,  $n=31$ ) or gain of *Igf2* ( $H19^{-/-}$ ,  $n=2$ ) compared to mice mono-allelic for *Igf2* ( $Igf2^{+/-}$ ,  $n=10$  or  $H19^{+/+}$ ,  $n=3$ ,  $p=NS$ , Log Rank test). **Middle** – Gain of *Igf2* ( $H19^{-/-}$ ,  $n=15$ ) did not alter survival of B6 *p53*<sup>-/-</sup> mice ( $p=NS$ , Log Rank test) compared to mice mono-allelic for *Igf2* ( $H19^{+/+}$ ,  $n=22$ ). **Bottom** – Loss of *Igf2* ( $Igf2^{-/-}$ ,  $n=3$ ) or gain of *Igf2* ( $H19^{-/-}$ ,  $n=1$ ) did not significantly alter survival of F2 hybrid *p53*<sup>-/-</sup> mice compared to mice mono-allelic for *Igf2* ( $Igf2^{+/-}$ ,  $n=22$  or  $H19^{+/+}$ ,  $n=3$ ,  $p=NS$ , Log Rank test). NB – note low numbers in F2 analysis. **Note abbreviations;**  $Igf2^{+/-}$  =  $Igf2^{ml/+}$  and  $Igf2^{+/+}$ .  $Igf2^{-/-}$  =  $Igf2^{ml/-}$  and  $Igf2^{-/-}$ .  $H19^{+/+}$  =  $H19^{ml/+}$  and  $H19^{+/+}$ .  $H19^{-/-}$  =  $H19^{ml/-}$  and  $H19^{-/-}$ .

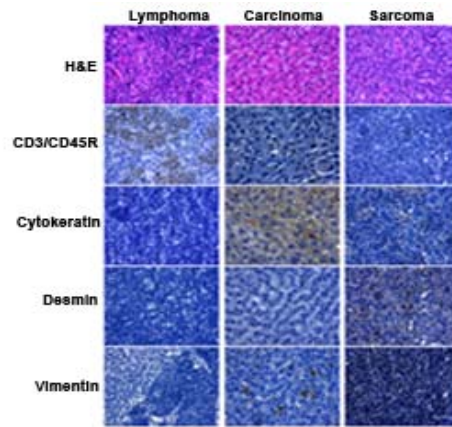

| Genotype                                           | Tumour type                 | No. of tumours |
|----------------------------------------------------|-----------------------------|----------------|
| <i>Igf2<sup>flp</sup>, p53<sup>+/+</sup></i> (129) | Lymphoma                    | 9(4)           |
|                                                    | Neuroendocrinoma            | 1(1)           |
|                                                    | Adenocarcinoma (undiff)     | 1(0)           |
|                                                    | Carcinoma (lung)            | 1(0)           |
|                                                    | Carcinoma (GI)              | 1(1)           |
|                                                    | Keraticoma                  | 1(1)           |
|                                                    | Leiomyoma                   | 1(0)           |
|                                                    | Leiomyosarcoma              | 1(1)           |
|                                                    | Undifferentiated round cell | 2(0)           |
|                                                    | Lymphoma                    | 2(1)           |
|                                                    | Squamous cell               | 2(1)           |
| <i>Igf2<sup>flp</sup>, p53<sup>+/+</sup></i> (129) | Adenocarcinoma (undiff.)    | 1(1)           |
|                                                    | Carcinoma (lung)            | 1(1)           |
|                                                    | Adenoma                     | 1(1)           |
|                                                    | Sarcoma                     | 3(3)           |
|                                                    | Lymphoma                    | 10(6)          |
| <i>H19<sup>tm</sup>, p53<sup>+/+</sup></i> (B6)    | Adenocarcinoma (breast)     | 1(0)           |
|                                                    | Keratioacanthoma            | 1(1)           |
|                                                    | Carcinoma (uterine)         | 1(0)           |
|                                                    | Carcinoma (GI)              | 2(2)           |
|                                                    | Lymphoma                    | 3(1)           |
|                                                    | Hepatocellular carcinoma    | 1(1)           |
| <i>H19<sup>tm</sup>, p53<sup>+/+</sup></i> (B6)    | Carcinoma (GI)              | 4(3)           |
|                                                    | Sarcoma                     | 2(0)           |

**Figure S5.**

**Representative immunohistochemical labelling and classification of tumours using DAB substrate (brown) and haematoxylin (blue).** All images x40 objective. Left column – lymphoma; positive for CD3 (T cell lymphoma), CD45R (B cell lymphoma) or both (mixed). Negative for cytokeratin, desmin and vimentin. Middle column (hepatocellular carcinoma) – positive for cytokeratin, vimentin positive = stromal cells, negative for CD3/CD45R and desmin. Right column (sarcoma) – negative for CD3/CD45R and cytokeratin, positive for desmin and vimentin (stromal cells). **Table** – tumour histio-type assembled by genotype; classified by Histopathologist (FP) blinded to genotype. Number in brackets = males.

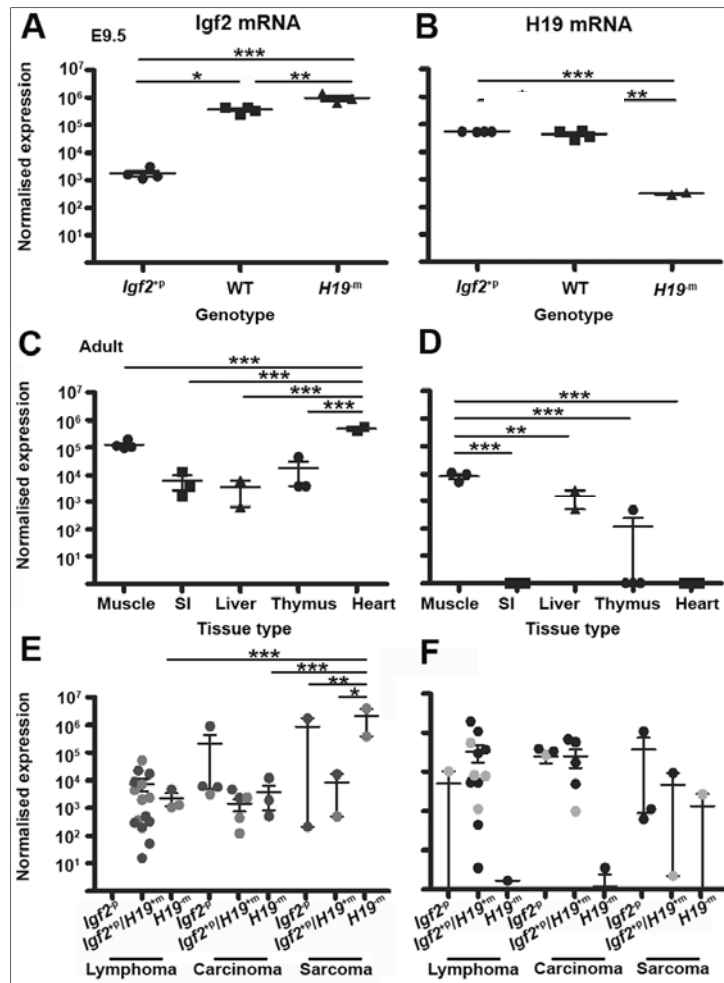

**Figure S6.**

**Sarcomas from *p53*<sup>+/-</sup> mice with bi-allelic *Igf2* expressed higher *Igf2* mRNA levels comparable to embryonic levels of expression.**

*Igf2* and *H19* mRNA expression normalised to 100,000 copies of  $\beta$ -actin. **A.** Embryos null for *Igf2* paternal allele had a significantly lower *Igf2* mRNA expression (*Igf2*<sup>+m/-p</sup>, n=5) compared to WT (*Igf2*<sup>+/+</sup>, n=4, \*p<0.05) and embryos bi-allelic for *Igf2* (*H19*<sup>-m/+p</sup>, n=3, \*\*\*p<0.0001). WT embryos had a significantly lower expression compared to embryos bi-allelic for *Igf2*. **B.** There was no significant differences in *H19* mRNA expression between embryos null for *Igf2* (*Igf2*<sup>+m/-p</sup>, n=4) compared to WT (*Igf2*<sup>+m/+p</sup>, n=4). Mice with bi-allelic *Igf2* expression (*H19*<sup>-m/+p</sup>, n=2) had significantly lower *H19* mRNA expression compared to mice null and WT for *Igf2*. **C.** *Igf2* mRNA expression was significantly different in the heart (n=2) compared to muscle (n=4), small intestine (n=3), liver (n=2) and thymus (n=3). There was no significant difference between other tissues. **D.** *H19* mRNA expression was significantly different in the muscle (n=3) compared to small intestine (n=3), liver (n=2), thymus (n=4) and heart (n=4). There was no significant difference between other tissues. **E.** *Igf2*<sup>+p</sup> equals *Igf2*<sup>-m/+p</sup> and *Igf2*<sup>+/+</sup>. *Igf2*<sup>-p</sup> equals *Igf2*<sup>+m/-p</sup> and *Igf2*<sup>-m/-p</sup>. *H19*<sup>+m</sup> = *H19*<sup>+m/-p</sup> and *H19*<sup>+m/+p</sup>. *H19*<sup>-m</sup> = *H19*<sup>-m/+p</sup> and *H19*<sup>-m/-p</sup>. Black circles – male. Gray circles – female. *Igf2* allelic dose did not affect *Igf2* expression in lymphomas (*Igf2*<sup>p</sup> n=1, *Igf2*<sup>+p</sup>/*H19*<sup>+m</sup> n=16, *H19*<sup>-m</sup> n=3) or carcinomas (*Igf2*<sup>p</sup> n=4, *Igf2*<sup>+p</sup>/*H19*<sup>+m</sup> n=7, *H19*<sup>-m</sup> n=4). Loss of paternal *Igf2* did not significantly alter *Igf2* mRNA expression in sarcomas (*Igf2*<sup>p</sup> n=2) relative to *Igf2*<sup>+p</sup>/*H19*<sup>+m</sup> (n=2), implicating maternal allele expression (loss of imprinting). There was a significant increase in *Igf2* mRNA expression in sarcomas with bi-allelic *Igf2* expression (n=2) compared to monoallelic *Igf2* tumors (*Igf2*<sup>+p</sup>, p<0.05) and mice null for *Igf2* (*Igf2*<sup>p</sup>, p<0.001). **F.** There was no significant difference in *H19* mRNA expression dependent on *Igf2* allelic dose in lymphomas (*Igf2*<sup>p</sup> n=2, *Igf2*<sup>+p</sup>/*H19*<sup>+m</sup> n=14, *H19*<sup>-m</sup> n=1), carcinomas (*Igf2*<sup>p</sup> n=4, *Igf2*<sup>+p</sup>/*H19*<sup>+m</sup> n=6, *H19*<sup>-m</sup> n=3) or sarcomas (*Igf2*<sup>p</sup> n=3, *Igf2*<sup>+p</sup>/*H19*<sup>+m</sup> n=2, *H19*<sup>-m</sup> n=2). All 1-way ANOVA, Tukey's multiple comparison; \*\*\*p<0.0001, \*\*p<0.001, \*p<0.01.

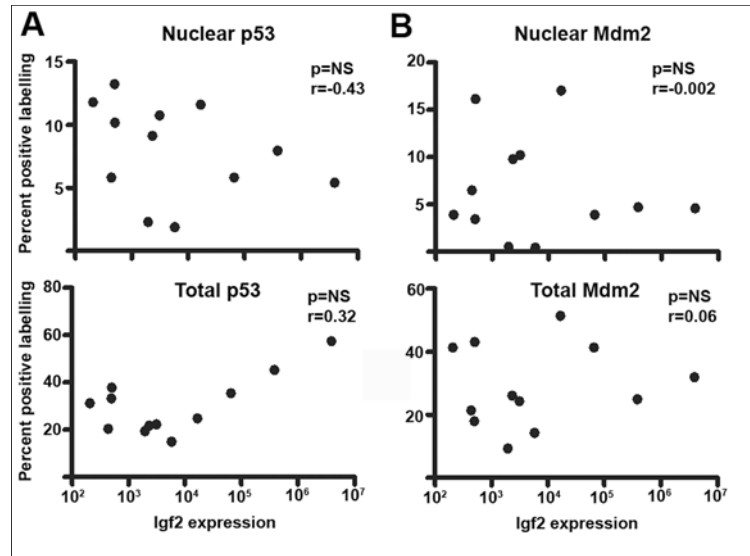

**Figure S7.**

**Igf2 expression did not correlate with either p53 or Mdm2 protein levels or localisation in solid tumours.** **A.** There was no correlation between *Igf2* mRNA level and nuclear p53 levels (above, n=13, p=NS, r = -0.43), or total p53 levels (below, n=13, p=NS, r = 0.32), **B.** Nuclear Mdm2 levels (above, n=13, p=NS, r = -0.002) and total Mdm2 levels (below, n=13, p=NS, r = 0.06, Spearman's) also did not correlate with *Igf2* mRNA expression. (NS=not significant).

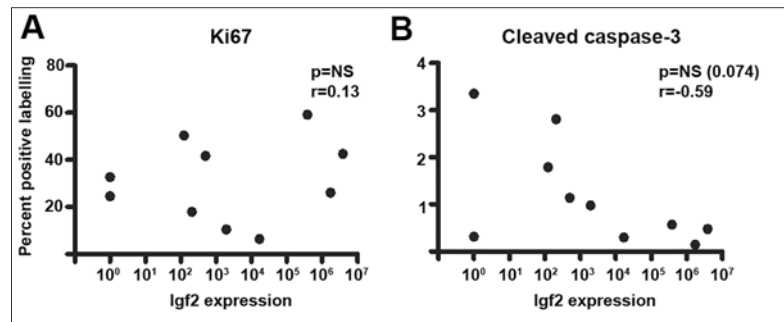

**Figure S8.**

**Proliferation and apoptosis did not correlate with *Igf2* mRNA expression in carcinomas and sarcomas *p53*<sup>+/-</sup> tumours.** **A.** Mean percentage proliferating cells did not correlate with *Igf2* expression levels (n=10, r = 0.13, p=NS). **B** – Whilst there was no correlation between mean percentage apoptotic cells and *Igf2* expression (n=10, r = -0.59, p=NS) this was approaching significance (p=0.074, Spearman's).

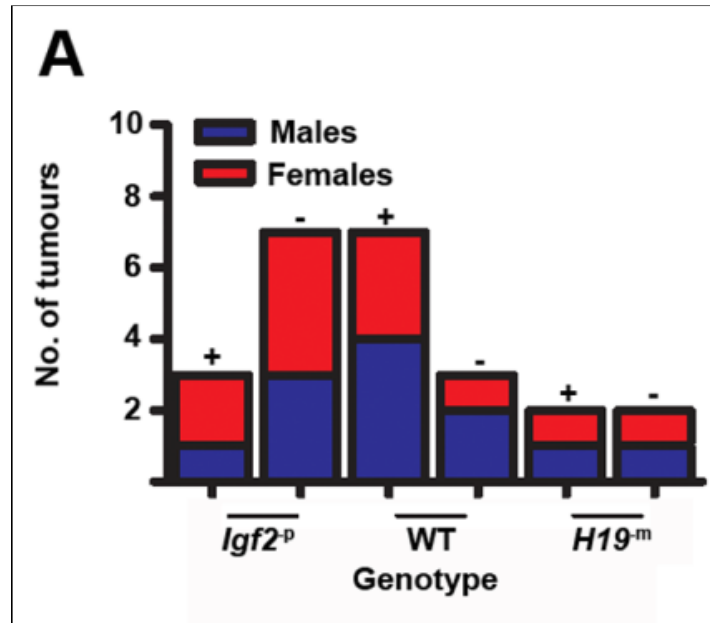

**Figure S9.**

***Igf2* allelic dose did not alter the frequency of ER- $\alpha$  positive solid tumours in  $p53^{+/-}$  mice. A.** There was no significant difference in the proportion of ER- $\alpha$  positive  $p53^{+/-}$  tumours in *Igf2<sup>p</sup>* (n=1 male and 2 females) and ER- $\alpha$  negative tumours (n=3 males and 4 females) relative to *Igf2* WT ER- $\alpha$  positive  $p53^{+/-}$  tumours (n=4 males and 3 females) and ER- $\alpha$  negative tumours (n=2 males and 1 female, p=NS, Fisher's exact). There was no significant difference in the proportion of ER- $\alpha$  positive  $p53^{+/-}$  tumours with bi-allelic *Igf2* expression *H19<sup>m</sup>* (n=1 male and 1 female) and ER- $\alpha$  negative tumours (n=1 male and 1 female) relative to *Igf2* WT  $p53^{+/-}$  tumours (p=NS, Fisher's exact test).

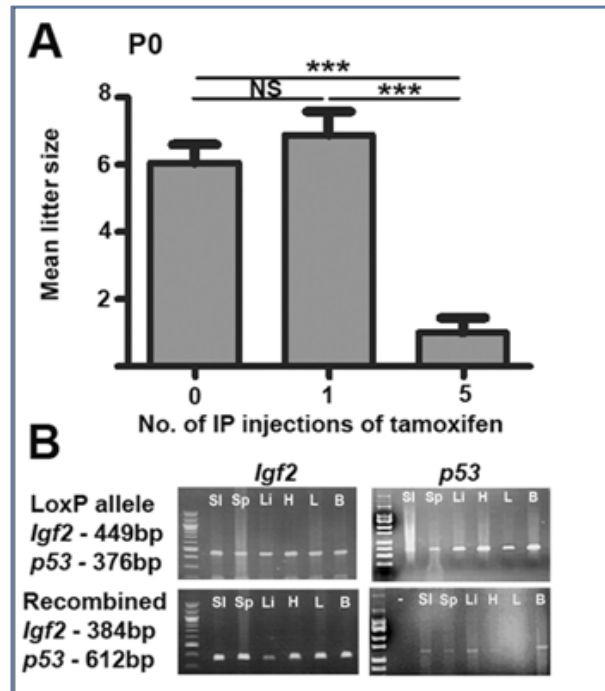

**Figure S10.**

**Mean litter size of conditional mouse breeding following Tamoxifen injection.**

**A.** Mean litter size of conditional mouse breeding was reduced following injections of 1mg Tamoxifen at E10.5. There was a significant deficit in the mean litter size following 5 daily injections (n=10 litters) compared to no injections (n=15 litters, \*\*\*p<0.0001) and 1 injection at E10.5 (n=18 litters, \*\*\*p<0.0001). **B.** Recombination of the *Igf2*<sup>fl(loxP)</sup> alleles was induced in all organs following a single 1mg IP injection of Tamoxifen at E10.5, but may not have been 100% efficient. Recombination of the *p53*<sup>loxP</sup> alleles was induced in all organs but relative levels differed. Above; PCR of intact alleles using F1 and R1 primers. Below; PCR of recombined alleles using F1 and R10 primers. (SI – small intestine, Sp – spleen, Li – liver, H – heart, L – lung, B – brain). Note: The progeny of *Igf2*<sup>fl/fl</sup>, *p53*<sup>fl/fl</sup> females mated with *Igf2*<sup>+fl</sup>, *p53*<sup>+fl</sup>, R26Cre<sup>+/-</sup> males were born at the normal Mendelian ratios without Tamoxifen (n=60, p=NS,  $\chi^2 = 6.894$ , 7df). Male (total = 37) and female (total = 28) progeny from the conditional cross of *Igf2*<sup>fl/fl</sup>, *p53*<sup>fl/fl</sup> females x *Igf2*<sup>fl/+</sup>, *p53*<sup>fl/+</sup>, R26Cre<sup>+/-</sup> and injection of 1mg of Tamoxifen at E10.5 lead to normal Mendelian segregation at P10.
